# Supplementary material for: Structural designing of Zn2SiO4:Mn nanocrystals by co-doping of alkali metal ions in mesoporous silica channels for enhanced emission efficiency with short decay time
Source: Royal Society of Chemistry journal article supplement (doi:10.1039/d1ra05515a), 2021-01-01
Supplement: d1ra05515a1.pdf [file d1ra05515a1.pdf]

## **Electronic Supplementary information (ESI)**

### **Structural designing of Zn<sub>2</sub>SiO<sub>4</sub>:Mn nanocrystals by co-doping of alkali metal ions in mesoporous silica channels for enhanced emission efficiency with short decay time**

Neeti Tripathi,\* Tomoko Akai

*Nanomaterials Research Institute (NMRI), National Institute of Advanced Industrial Science and Technology (AIST), Kansai Center, 1-8-31, Midorigaoka, Ikeda, Osaka 563-8577, Japan*

Corresponding author: [n-tripathi@aist.go.jp](mailto:n-tripathi@aist.go.jp)

#### **Characterization techniques:**

Formation of Zn<sub>2</sub>SiO<sub>4</sub>:Mn,(Li<sup>+</sup>, Na<sup>+</sup>, K<sup>+</sup>) crystals were confirmed by x-ray diffraction (XRD) [RIGAKU, Ultima IV] using Cu-Kα radiation. Scanning transmission electron microscopy (STEM) measurement was performed using Techni G<sup>2</sup> at 200 keV. Information about the bonding states and elemental composition were extracted from x-ray photoemission spectroscopy (XPS) [Perkin-Elmer, 04-500 dual anode x-ray source instrument]. Before recording the XPS data, sample surface was etched by using low energy argon ion gun to remove the surface contaminations. Morphologies of the samples were investigated using scanning electron microscopy (SEM) equipped with EDS [JEOL, JSM-5900 LVS]. Photoluminescence (PL) spectra and decay profiles were recorded using Hitachi F-4500 fluorescence spectrometer. Quantum efficiency of undoped and K<sup>+</sup> ions doped samples were measured using QE-1100 [Otsuka Electronics] at excitation wavelength 254 nm and 425 nm. All the measurements were performed at room temperature. Standard green phosphor from Kasei Optonix Ltd. Japan was used to compare the performance of the phosphor presented in this work.

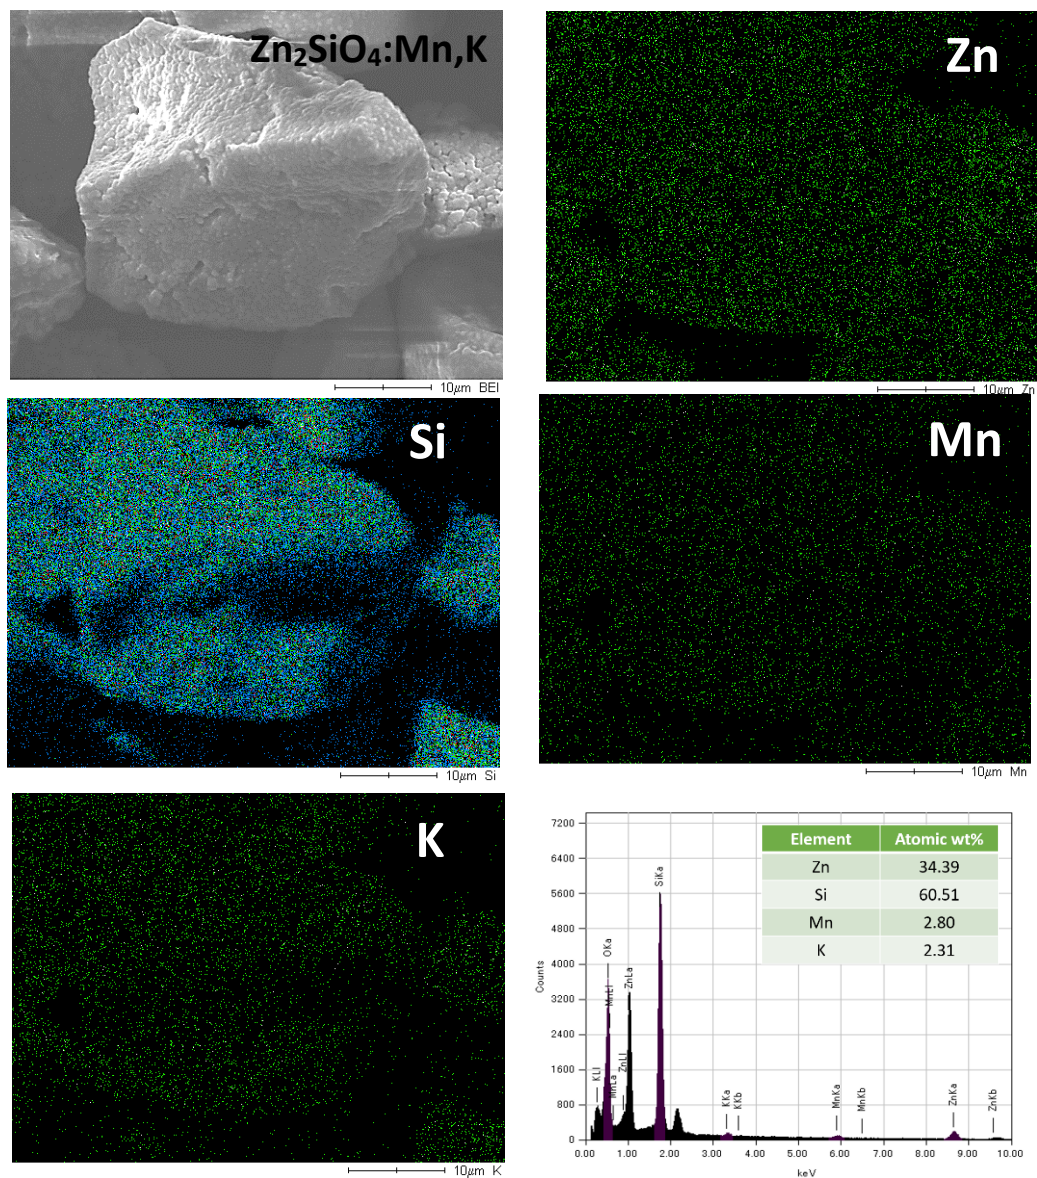

**Figure S1:** EDX elemental mapping of Zn<sub>2</sub>SiO<sub>4</sub>:Mn,K crystal synthesized in this work.

**Table S1:** Elemental distribution of Zn<sub>2</sub>SiO<sub>4</sub>:Mn crystal doped with 0.30 M of Li<sup>+</sup>, K<sup>+</sup> and Na<sup>+</sup> ions, estimated from x-ray photoemission spectroscopy (XPS).

| <b>Sample/Element</b>                                | <b>Zn</b> | <b>Si</b> | <b>O</b> | <b>Mn</b> | <b>Metal ion</b>        |
|------------------------------------------------------|-----------|-----------|----------|-----------|-------------------------|
| Undoped                                              | 7.66      | 23.97     | 67.63    | 0.74      | none                    |
| Zn <sub>2</sub> SiO <sub>4</sub> :Mn, Li-doped_0.30M | 5.8       | 23.68     | 68.14    | 0.91      | 1.46 (Li <sup>+</sup> ) |
| Zn <sub>2</sub> SiO <sub>4</sub> :Mn, K-doped_0.30M  | 8.67      | 22.05     | 65.42    | 1.4       | 2.45 (Na <sup>+</sup> ) |
| Zn <sub>2</sub> SiO <sub>4</sub> :Mn,,Na-doped_0.30M | 9.03      | 19.78     | 61.60    | 1.29      | 8.3 (K <sup>+</sup> )   |

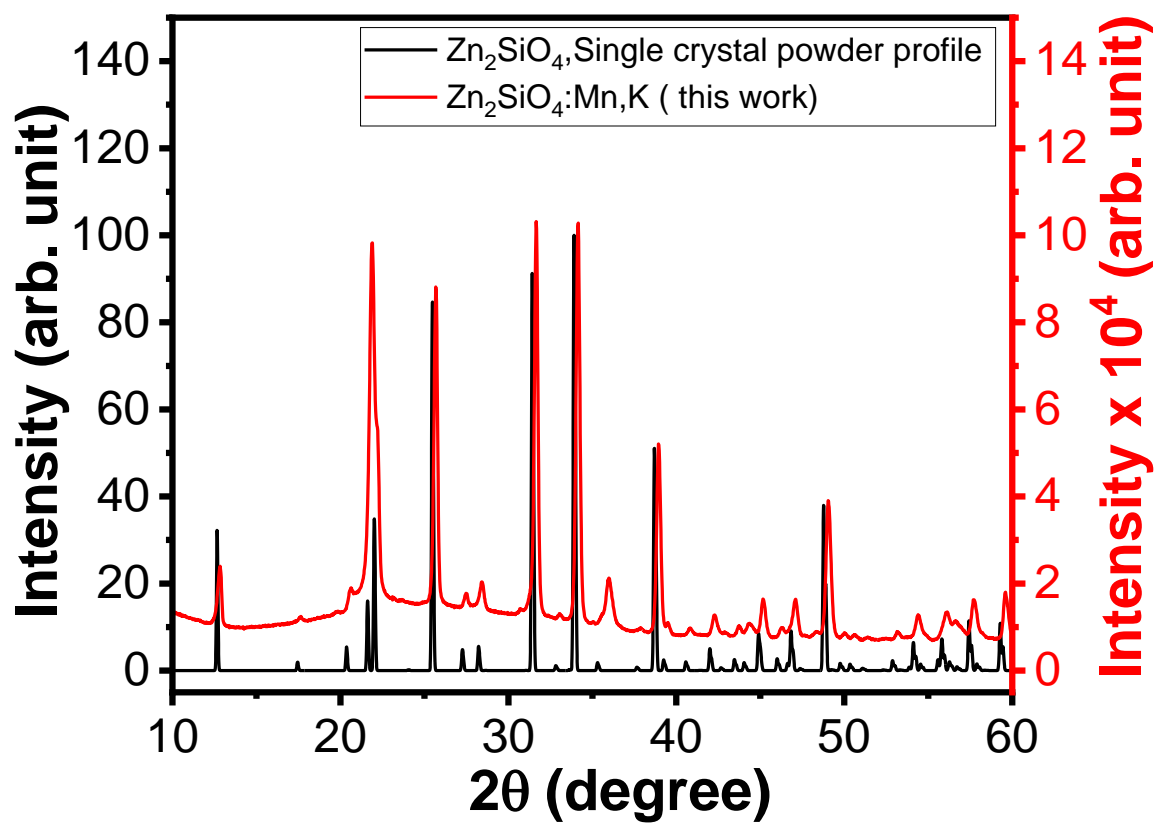

**Figure S2:** Comparison of  $\text{Zn}_2\text{SiO}_4$  single crystal XRD and  $\text{K}^+$  ions doped  $\text{Zn}_2\text{SiO}_4:\text{Mn}$  phosphor synthesized in this work.

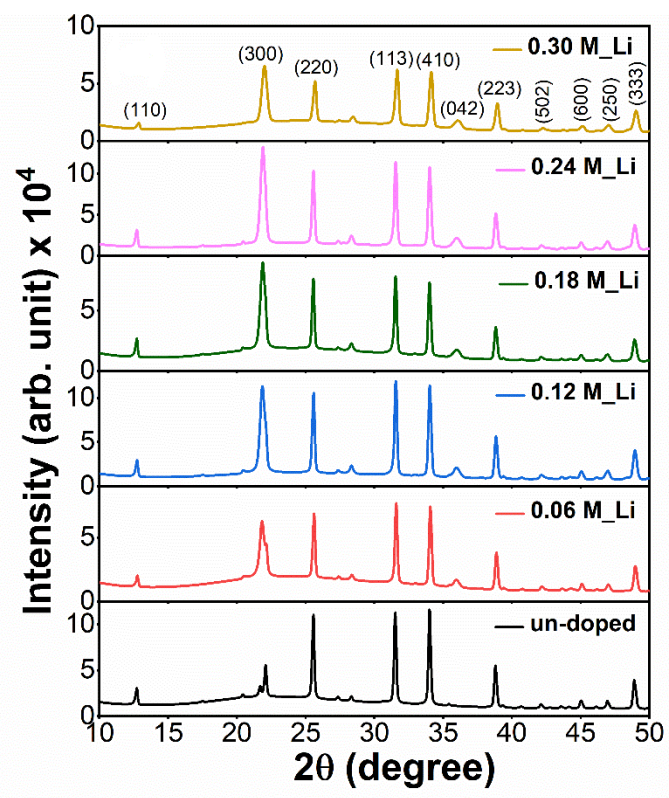

Figure S3: XRD patterns of Li<sup>+</sup> ions doped Zn<sub>2</sub>SiO<sub>4</sub>:Mn phosphor.

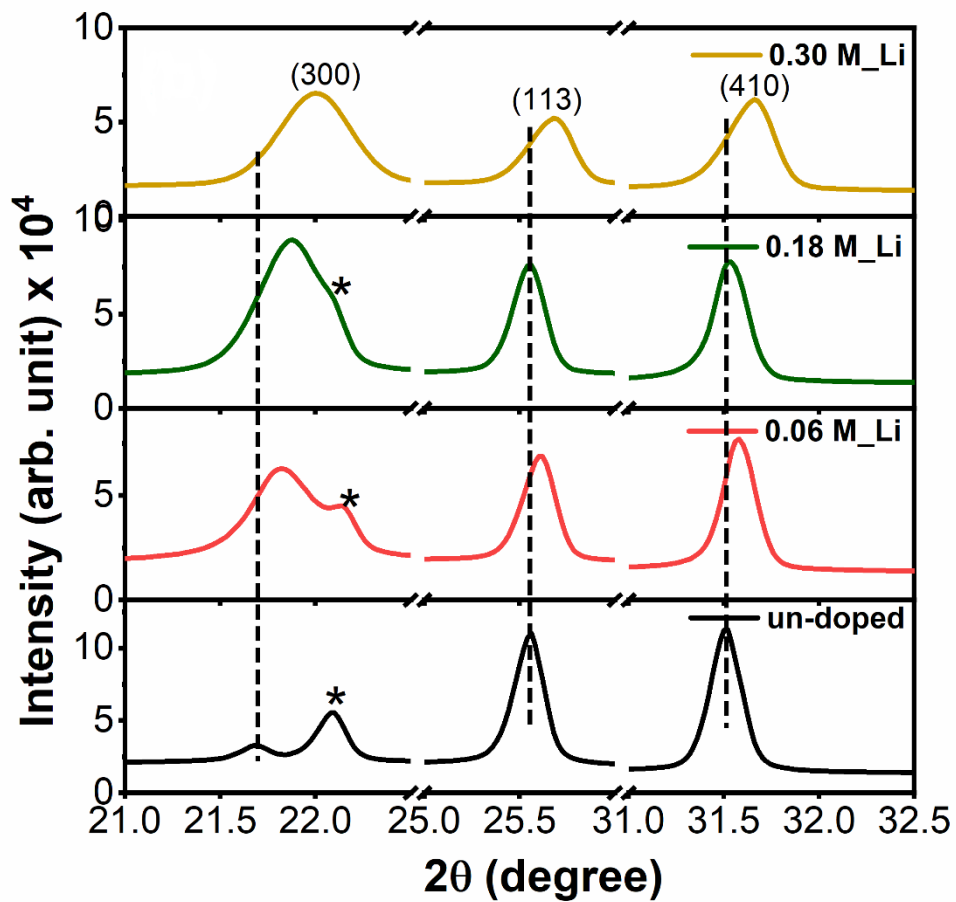

**Figure S4:** Extended XRD patterns ( $2\theta$  range 20-40°) of Li<sup>+</sup> ions doped Zn<sub>2</sub>SiO<sub>4</sub>:Mn phosphor.

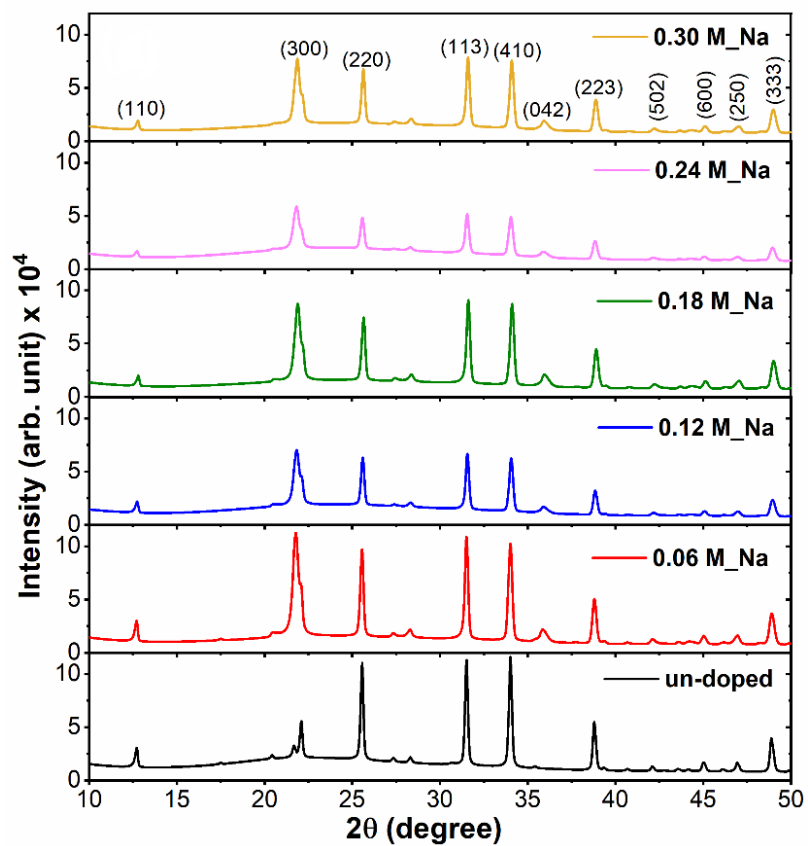

**Figure S5:** XRD patterns of Na<sup>+</sup> ions doped Zn<sub>2</sub>SiO<sub>4</sub>:Mn phosphor

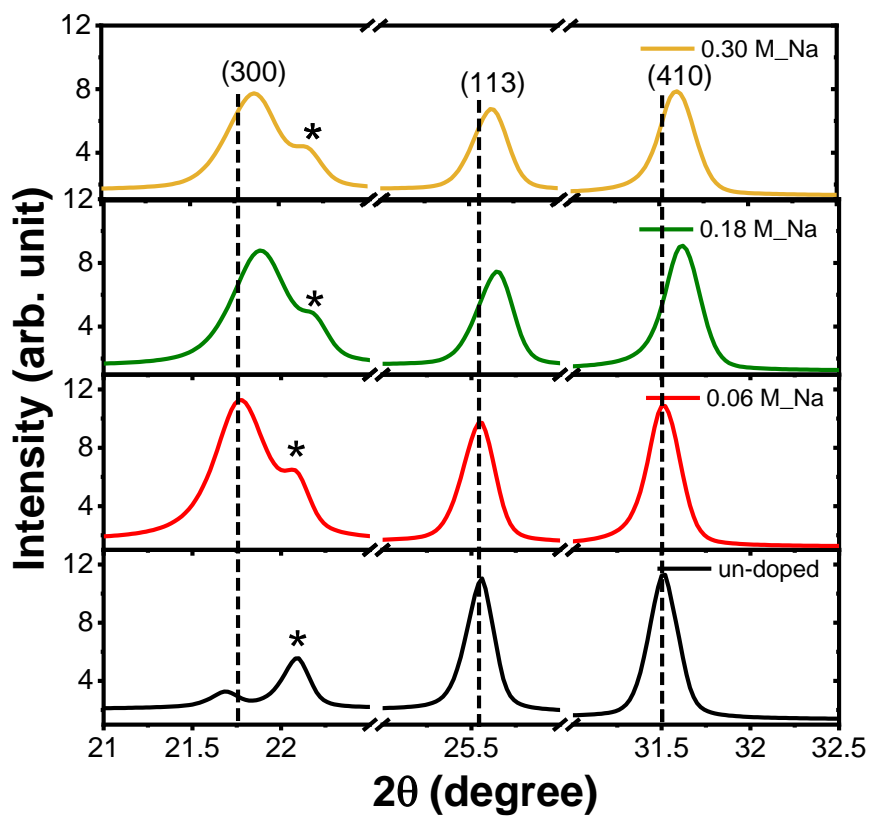

**Figure S6:** Extended XRD patterns ( $2\theta$  range 20-40°) of Na<sup>+</sup> ions doped Zn<sub>2</sub>SiO<sub>4</sub>:Mn phosphor.



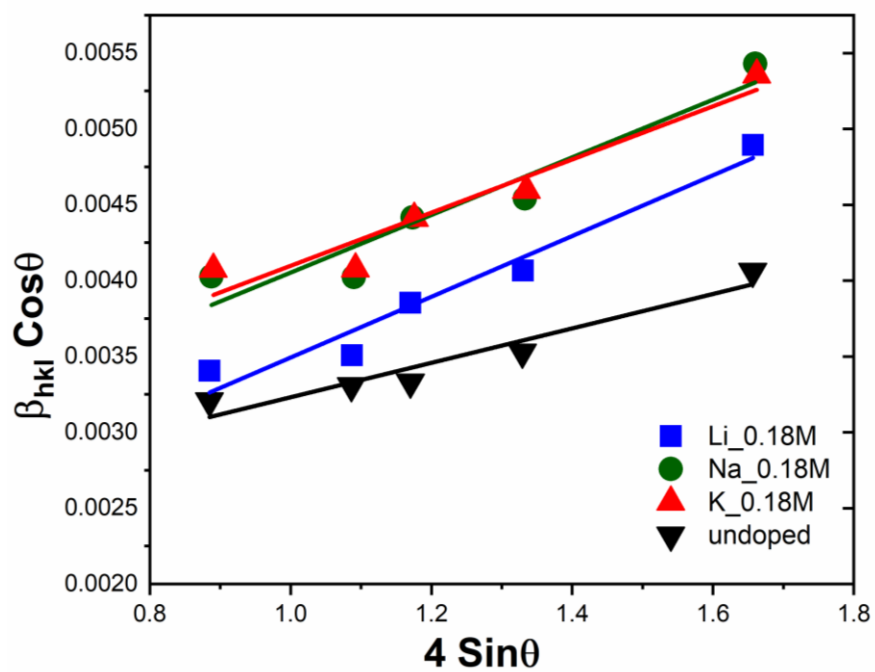

**Figure S7:** W-H plot for un-doped and doped  $\text{Zn}_2\text{SiO}_4:\text{Mn}(\text{Li}^+, \text{Na}^+, \text{K}^+)$  phosphor at doping concentration of 0.18 M.

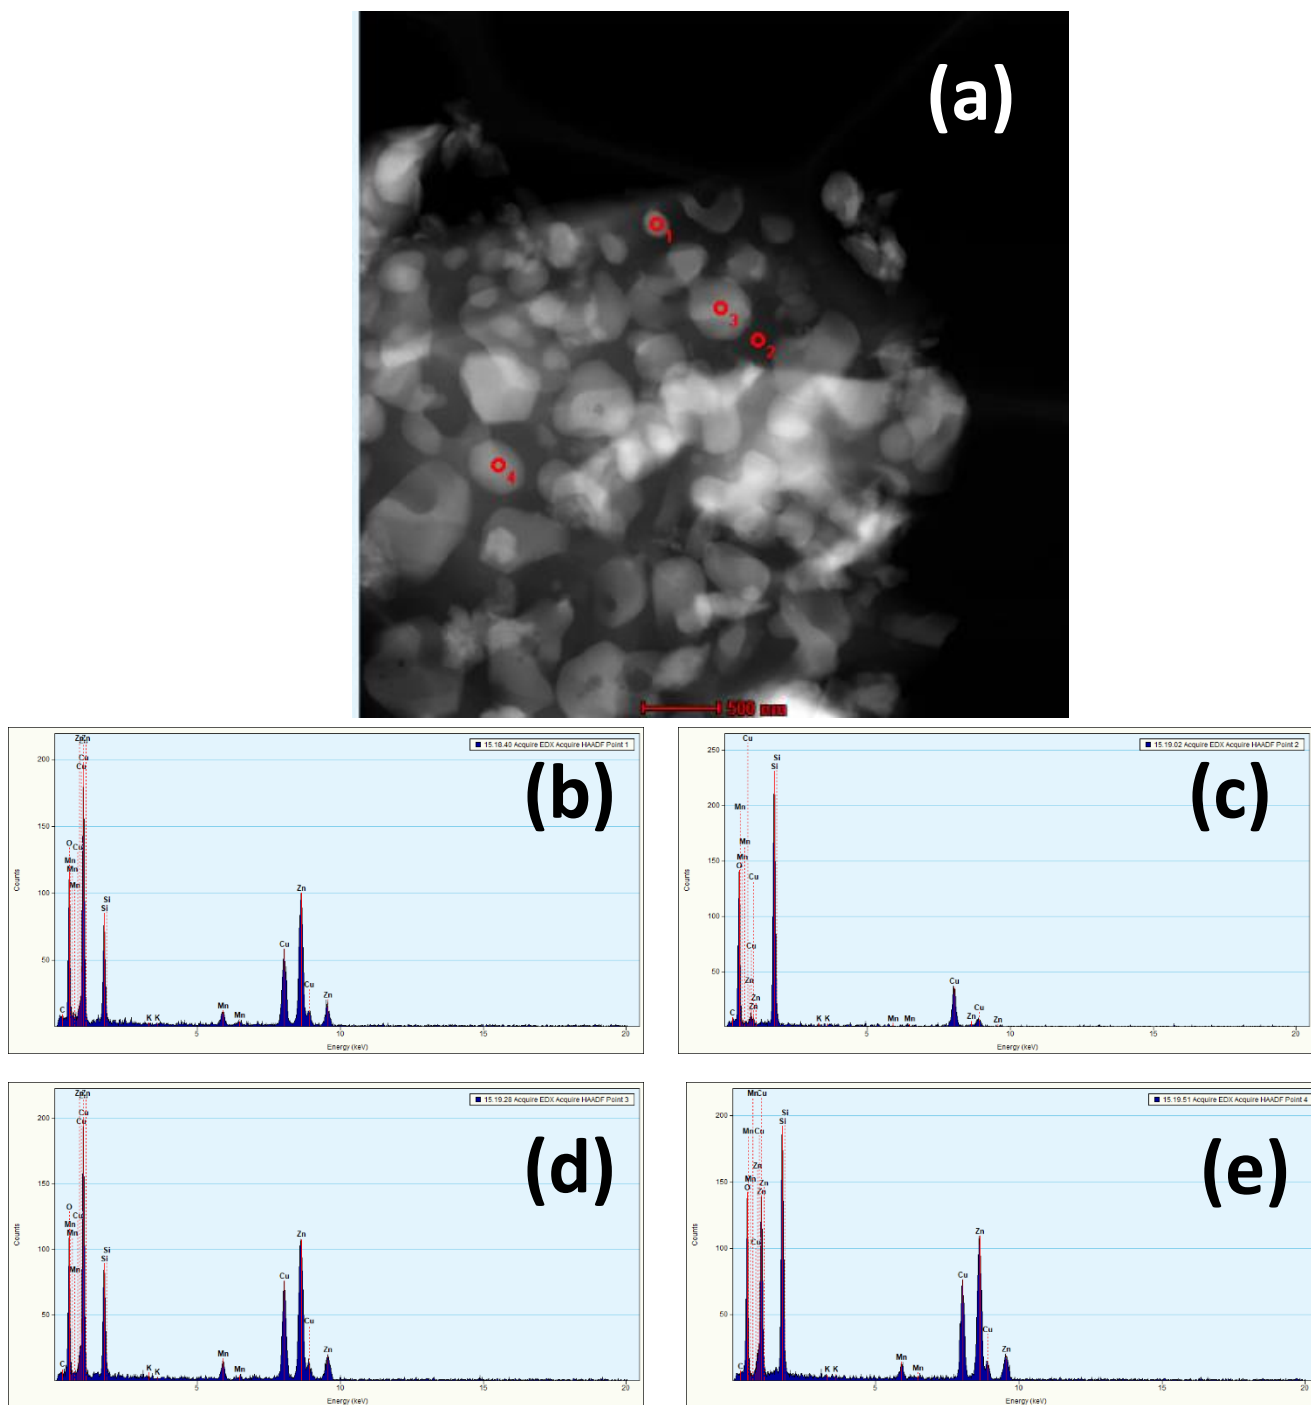

**Figure S8:** (a) STEM image of  $K^+$  ions doped  $Zn_2SiO_4:Mn$  phosphor (b) Elements profiling at point 1, (c) Elements profiling at point 2, (d) Elements profiling at point 3, (e) Elements profiling at point 4.

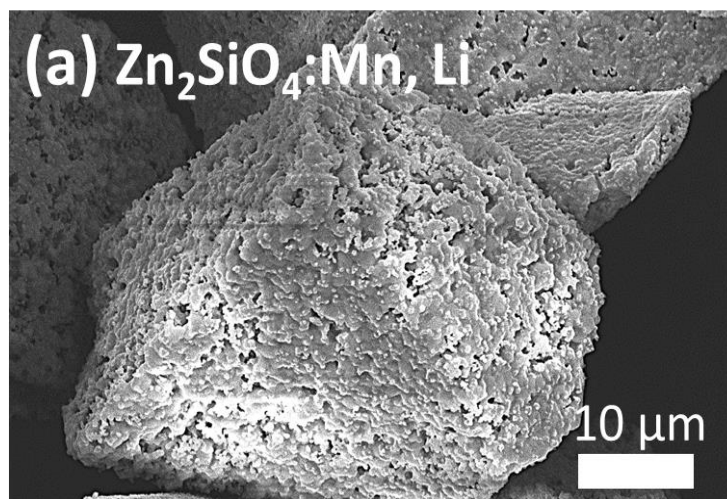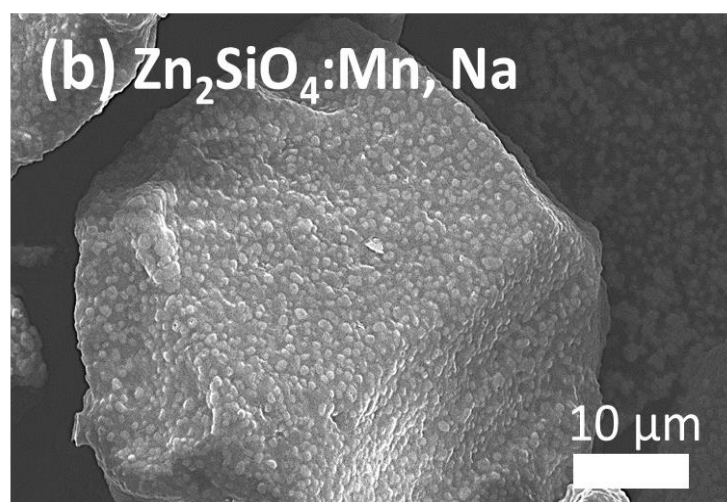

**Figure S9:** SEM micrographs of (a)  $\text{Li}^+$  ions doped  $\text{Zn}_2\text{SiO}_4:\text{Mn}$  phosphor (b)  $\text{Na}^+$  ions doped  $\text{Zn}_2\text{SiO}_4:\text{Mn}$  phosphor.

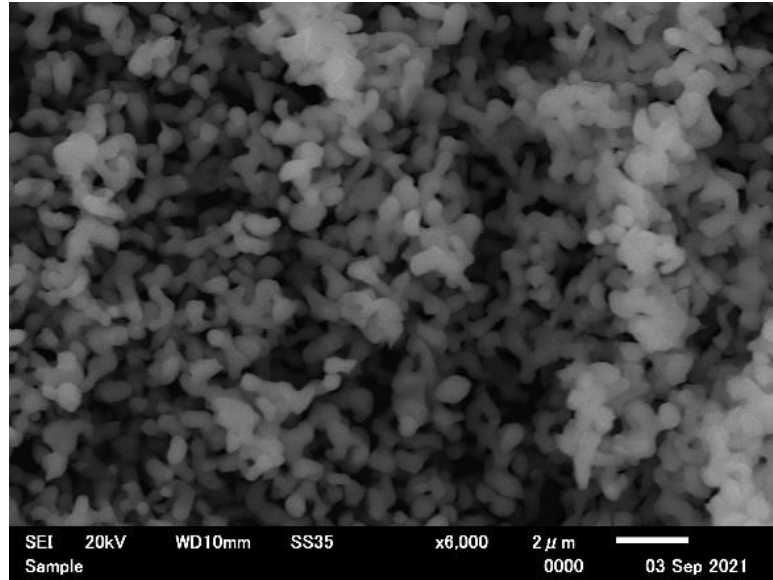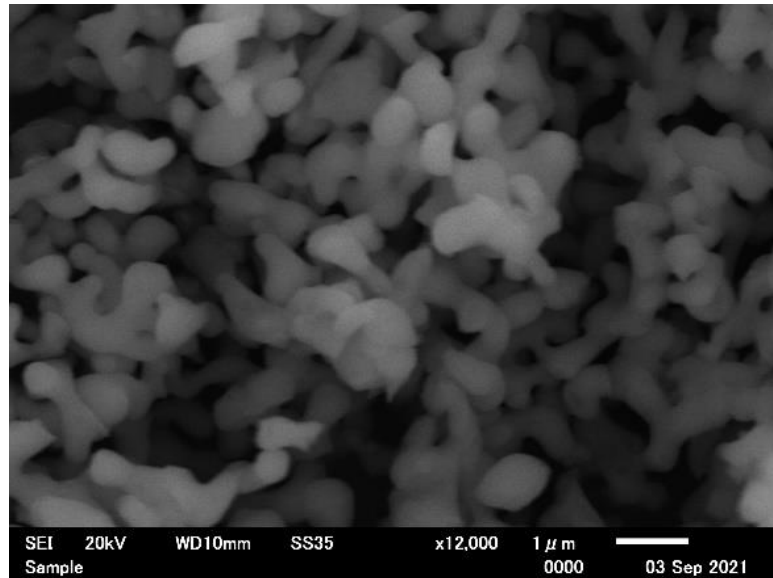

**Figure S10:** SEM micrographs of standard Zn<sub>2</sub>SiO<sub>4</sub>:Mn phosphor.

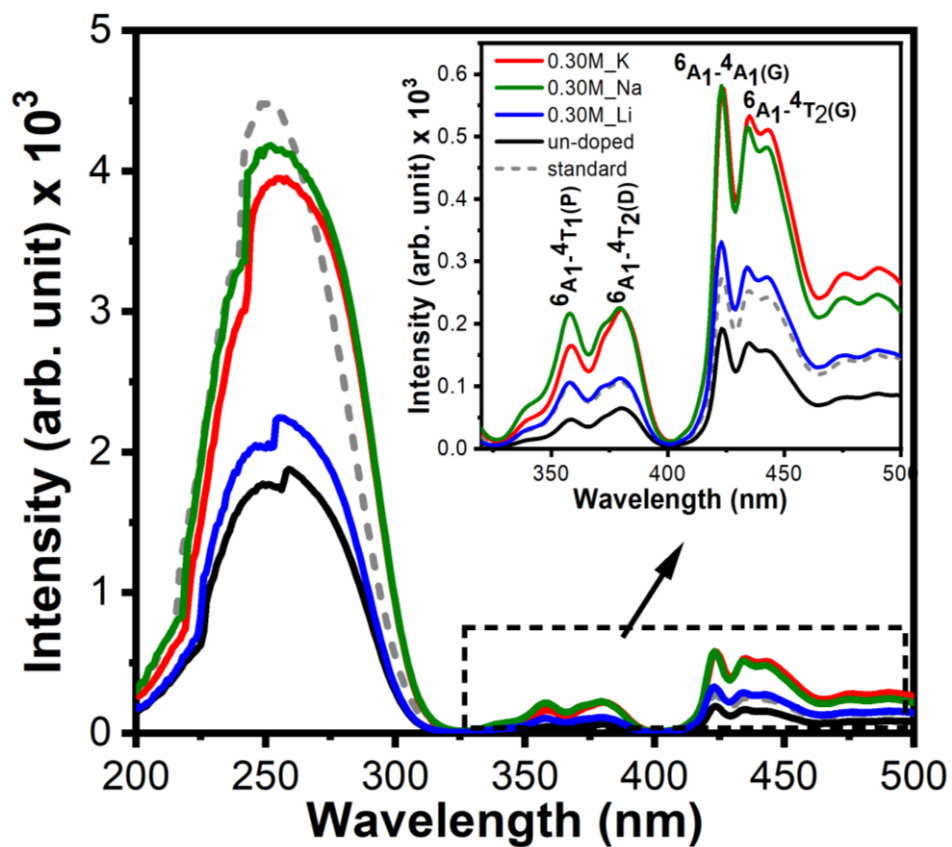

**Figure S11:** PLE spectrum for undoped and alkali metal ion (Li<sup>+</sup>, Na<sup>+</sup>, K<sup>+</sup>) doped Zn<sub>2</sub>SiO<sub>4</sub>:Mn phosphor at doping concentration of 0.30M.

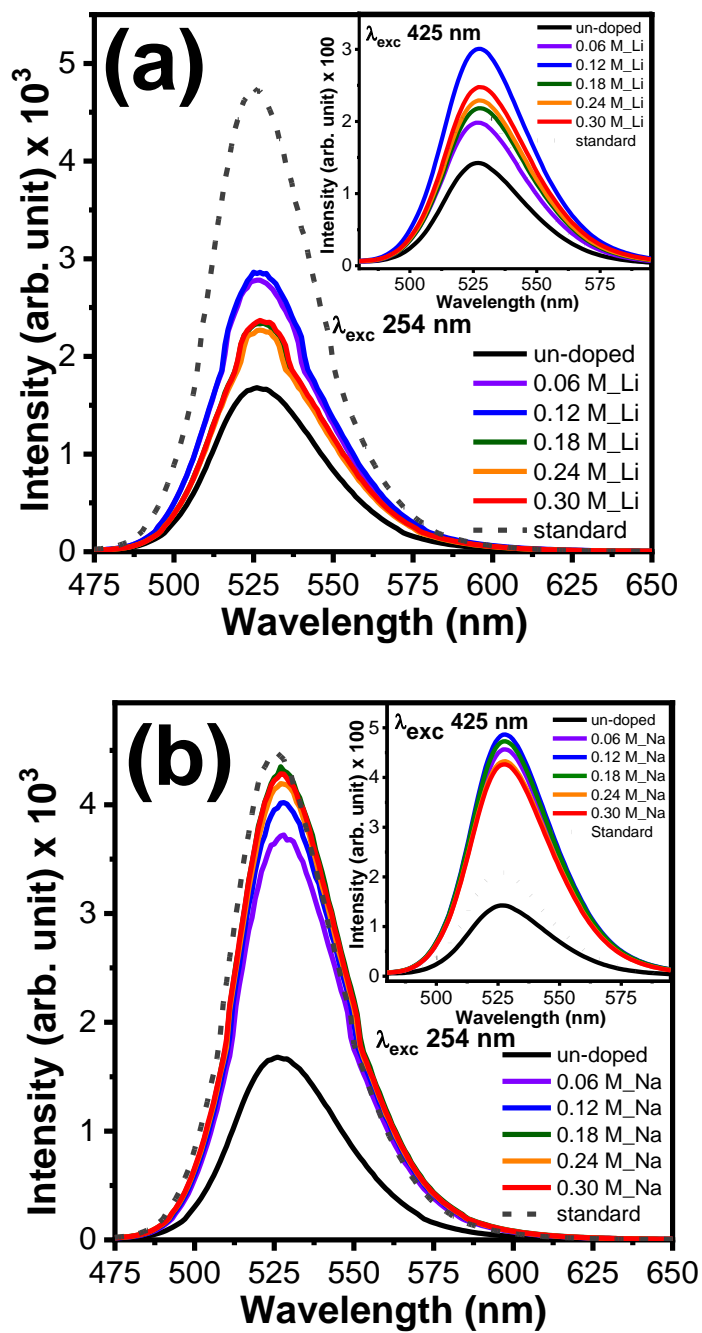

**Figure S12:** (a) PL emission spectra of (a)  $\text{Li}^+$  ions doped  $\text{Zn}_2\text{SiO}_4:\text{Mn}$  phosphor, and (b)  $\text{Na}^+$  ions doped  $\text{Zn}_2\text{SiO}_4:\text{Mn}$  phosphor, at  $\lambda_{exc}$  254 nm, inset  $\lambda_{exc}$  425 nm

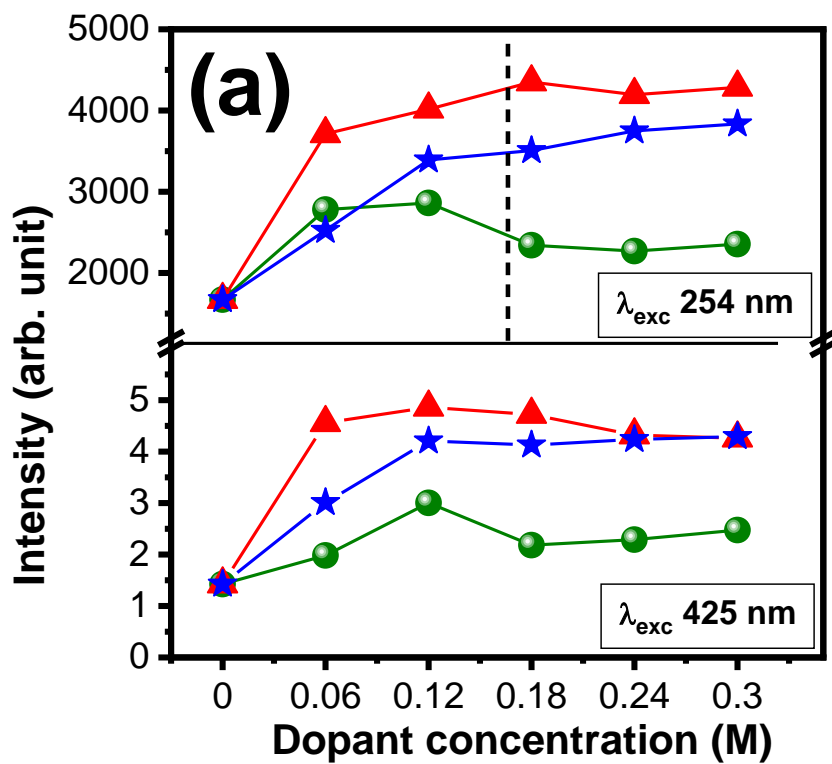

**Figure S13:** Dopant molar concentration dependence of PL emission intensities of  $\text{Li}^+$ ,  $\text{Na}^+$  and  $\text{K}^+$  ions doped  $\text{Zn}_2\text{SiO}_4:\text{Mn}$  phosphor at excitation wavelength 254 nm and 425 nm.

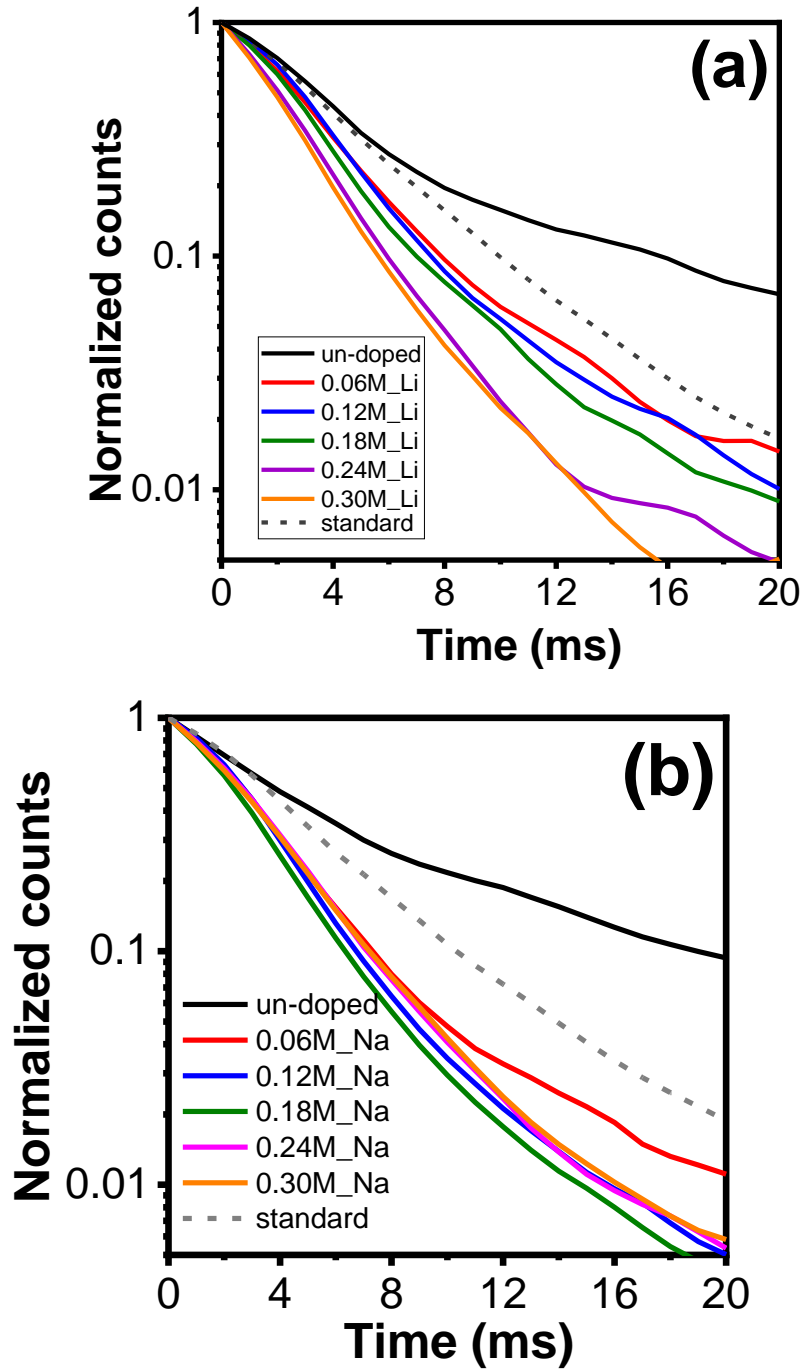

**Figure S14:** (a) Decay time profiles for un-doped, and Li<sup>+</sup> ions doped Zn<sub>2</sub>SiO<sub>4</sub>:Mn phosphor  
 (b) Decay time profiles for un-doped, and Na<sup>+</sup> ions doped Zn<sub>2</sub>SiO<sub>4</sub>:Mn phosphor



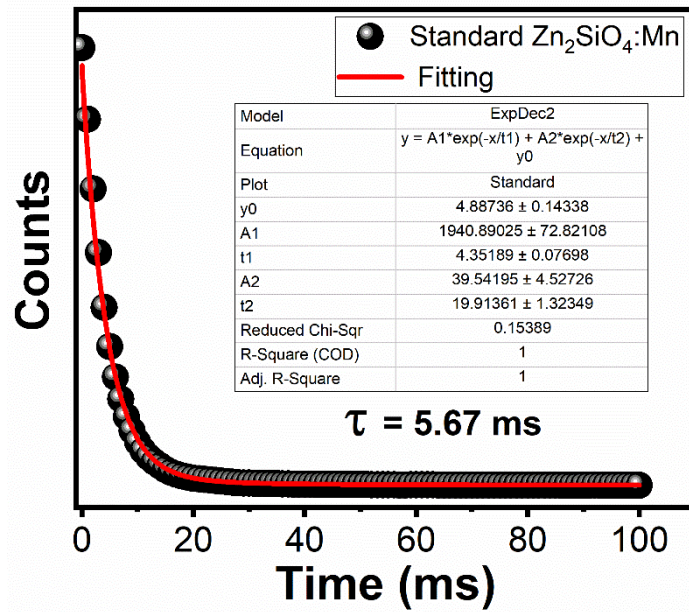

**Fig. S15:** Bi-exponential fitting of decay time profiles for standard Zn<sub>2</sub>SiO<sub>4</sub>:Mn phosphor.

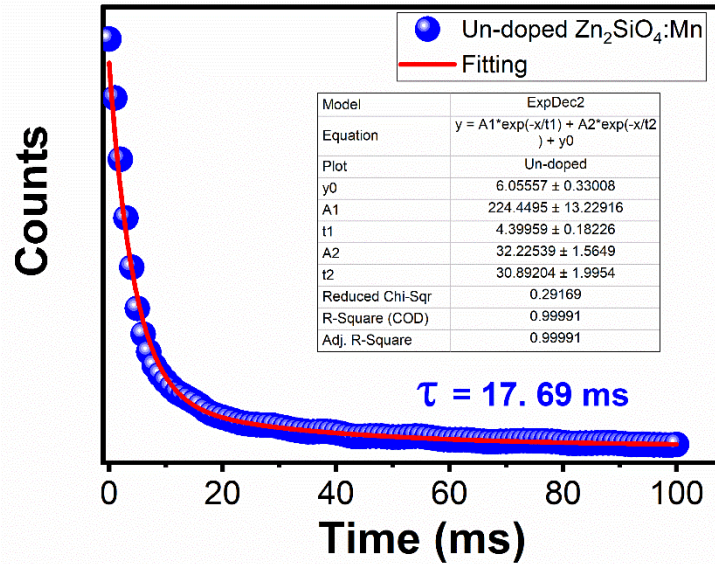

**Figure S16:** Bi-exponential fitting of decay time profiles for un-doped Zn<sub>2</sub>SiO<sub>4</sub>:Mn phosphor (synthesized in this work).

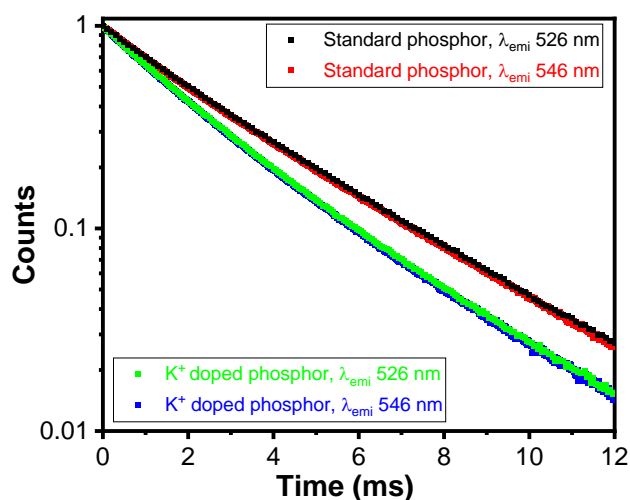

**Figure S17:** Decay time profiles of standard and  $K^+$  ions doped  $Zn_2SiO_4:Mn$  phosphor measured for emission at 526 nm and 546 nm, respectively.

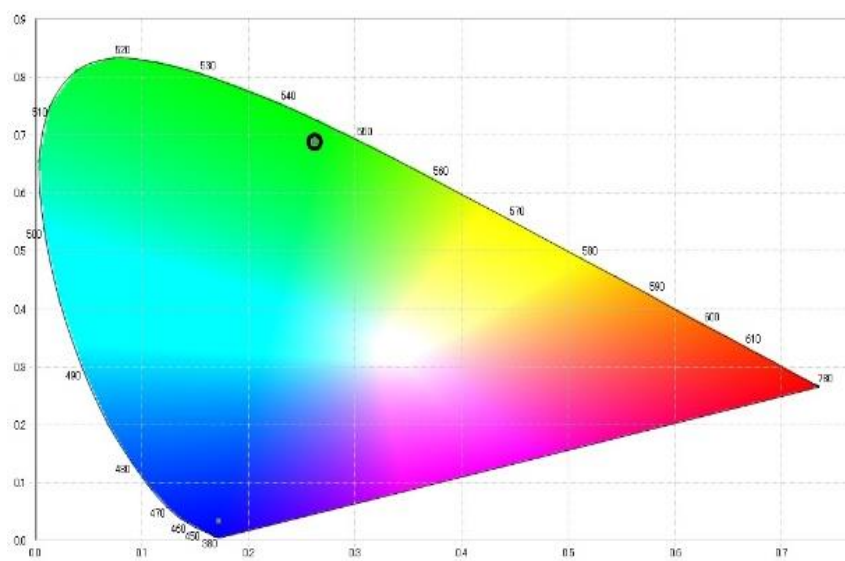

**Figure S18:** CIE diagram of 0.36M  $K^+$  ions doped  $Zn_2SiO_4:Mn$  phosphor under 254 and 425 nm excitations. Typical CIE color coordinates of 0.36M  $K^+$  ion doped  $Zn_2SiO_4:Mn$  phosphor are found to be (0.245, 0.697) under 254 nm excitation, in accordance with the commercial standard phosphor.

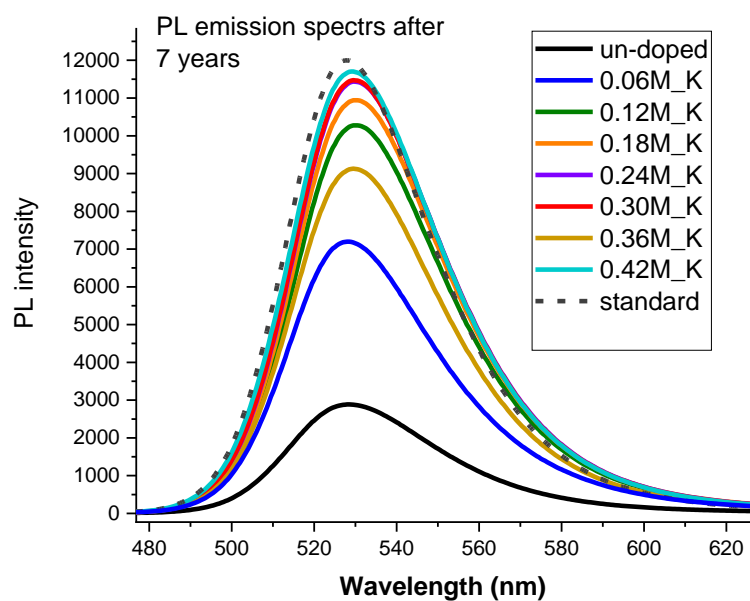

**Figure S19:** Comparison of PL emission intensities with respect to the standard phosphor after 7 years under 254 nm excitation.
